# Supplementary material
Source: MDPI journal article supplement (https://www.mdpi.com/2076-3298/5/9/102)
Supplement: s1 [file s1]

## Supplementary Materials

**Cytosolic distribution of metals (Cd, Cu) and metalloids (As, Se) in livers and gonads of field-collected fish exposed to an environmental contamination gradient: an SEC-ICP-MS analysis.**

Nastassia Urien <sup>1</sup>, Sabrina Jacob <sup>1</sup>, Patrice Couture <sup>1</sup>, Peter G. C. Campbell <sup>1,\*</sup>

<sup>1</sup> Institut national de la recherche scientifique, Centre Eau Terre Environnement (INRS-ETE), 490 rue de la Couronne, Québec, QC, Canada G1K 9A9

**Table S1: Summary of the total lengths of fish selected for the SEC-ICP-MS analyses. Lengths are given in centimeters (cm) as the mean  $\pm$  standard deviation (mean  $\pm$  sd).**

|         | <b>Total length (cm, mean <math>\pm</math> sd)</b> |       |   |
|---------|----------------------------------------------------|-------|---|
| RefMale | 40                                                 | $\pm$ | 2 |
| RefFem  | 43                                                 | $\pm$ | 4 |
| ExpMale | 37                                                 | $\pm$ | 2 |
| ExpFem  | 41                                                 | $\pm$ | 2 |

## Peak areas

## Copper

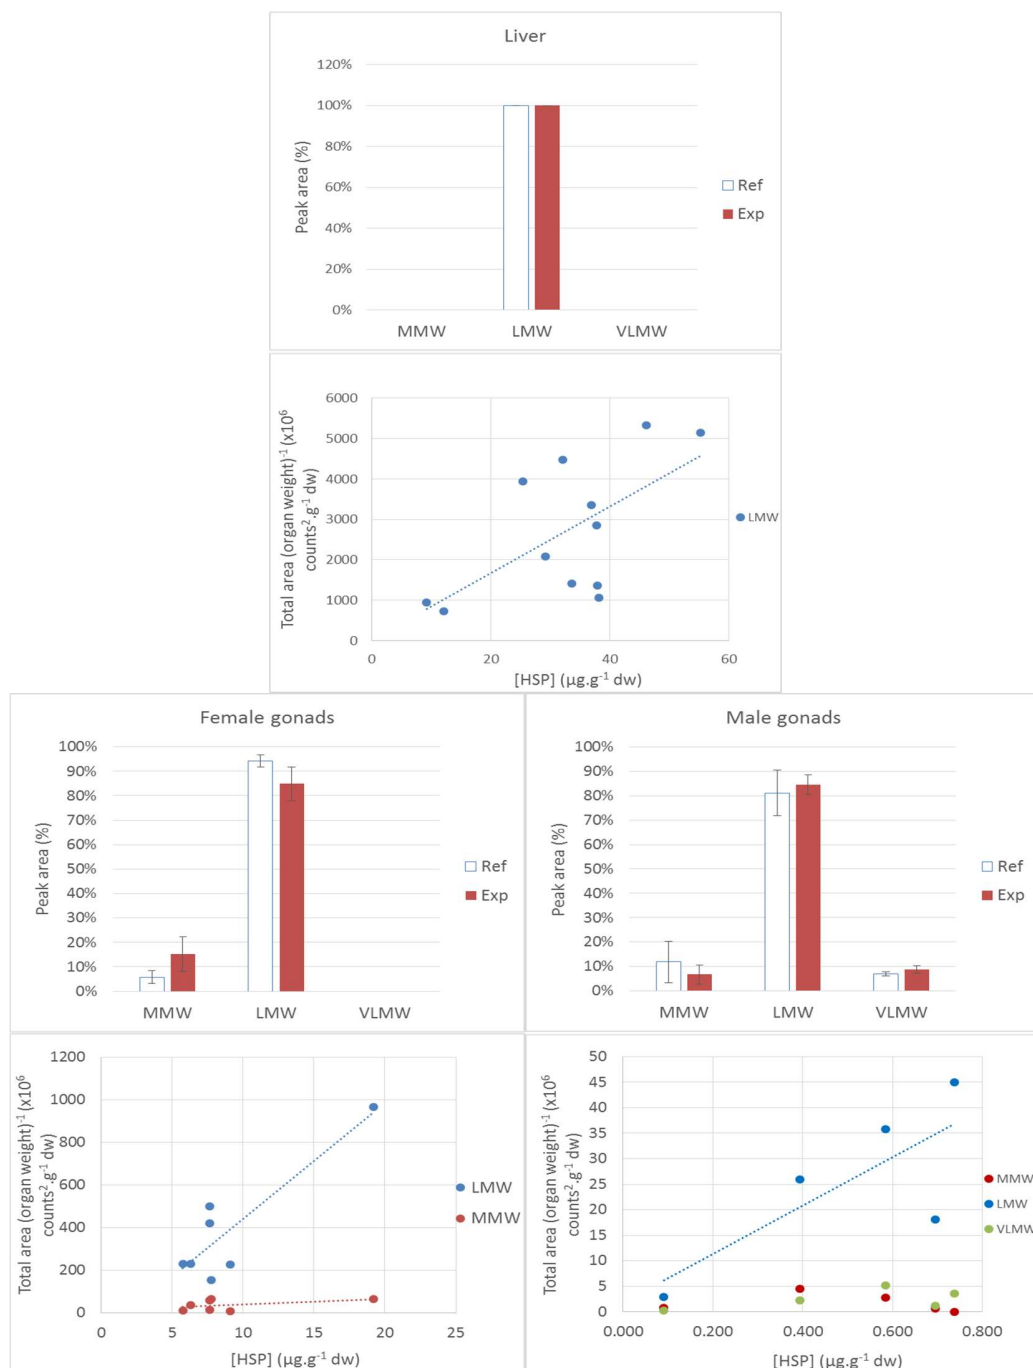

Figure S1: Peak area proportions among MW pools for Cu (mean ± standard error) and peak areas normalized by organ weight as a function of the total metal concentration in the HSP fraction of white sucker liver (males and females together) and gonads.

## Cadmium

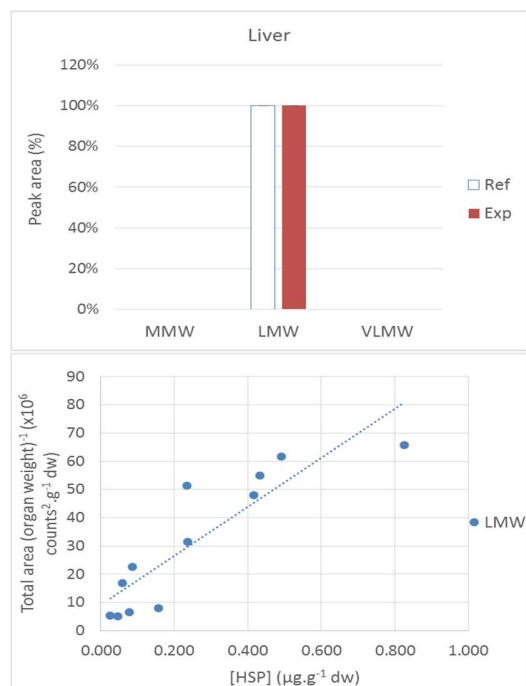

Figure S2: Peak area proportions among MW pools for Cd (mean  $\pm$  standard error; upper row) and peak areas normalized by organ weight as a function of the total metal concentration in the HSP fraction of white sucker liver (males and females together; lower row).

## Arsenic

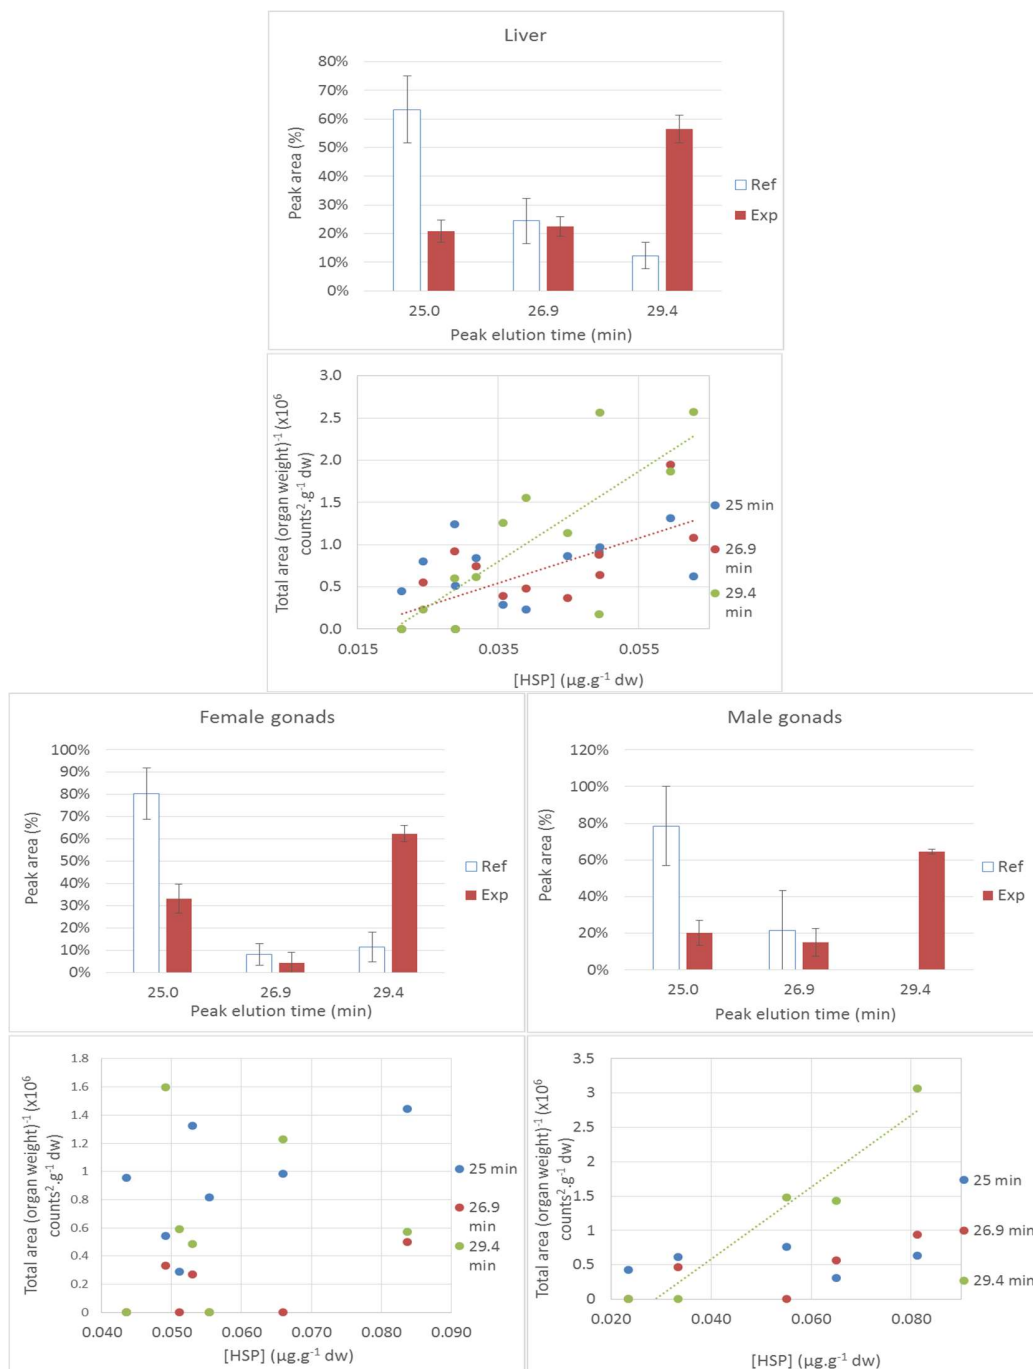

Figure S3: Peak area proportions among the three major peaks in the VLMW pool for As (mean  $\pm$  standard error) and peak areas normalized by organ weight as a function of the total metal concentration in the HSP fraction of white sucker liver (males and females together) and gonads.

## Selenium

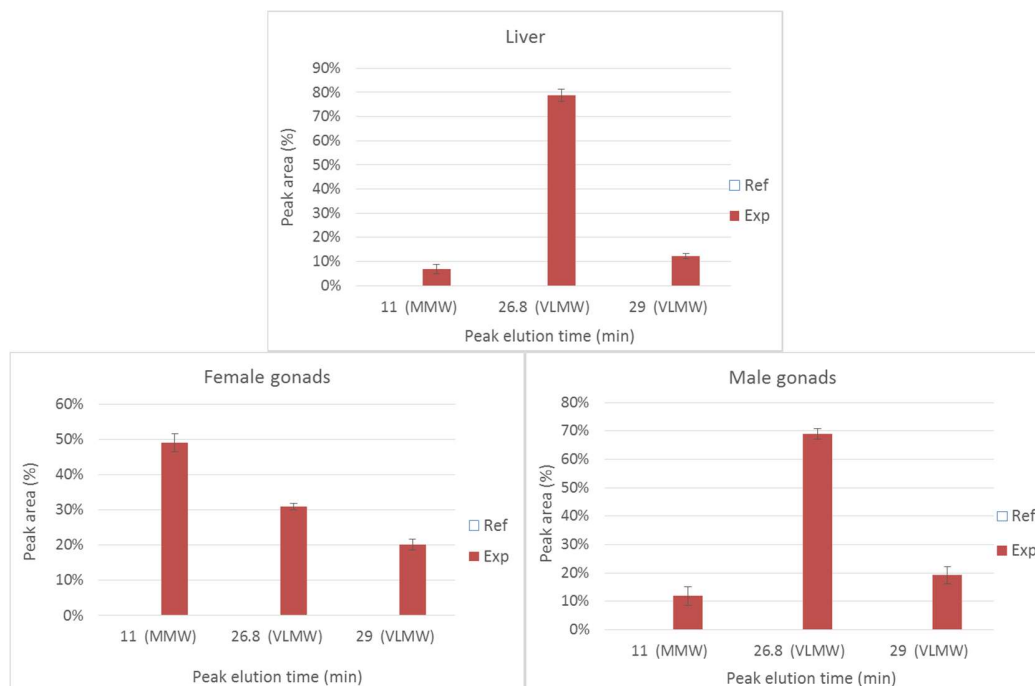

Figure S4: Peak area proportions among the peaks detected in the MMW and VLMW pools for Se (mean  $\pm$  standard error). No peak areas normalized by organ weight as a function of the total metal concentration in the HSP fraction of white sucker liver and gonads are presented, since no peaks were detected in reference fish.
